# Supplementary material
Source: PubMed Central journal article supplement (PMC6466757)

**Supplementary Table 1: Worst AKIN stages according to ALF etiology**

| <b>Worst AKIN</b> | <b>ACM DILI</b> | <b>Non-ACM DILI</b> | <b>Viral</b> | <b>Indeterminate</b> | <b>Other</b> | <b>p-value</b> |
|-------------------|-----------------|---------------------|--------------|----------------------|--------------|----------------|
| <b>AKIN 0</b>     | 7 (53.8)        | 7 (21.9)            | 17 (54.8)    | 15 (40.5)            | 3 (14.3)     | 0.052          |
| <b>AKIN 1/2</b>   | 2 (15.4)        | 7 (21.9)            | 2 (6.5)      | 7 (18.9)             | 5 (23.8)     |                |
| <b>AKIN 3</b>     | 4 (30.8)        | 18 (56.3)           | 12 (38.7)    | 15 (40.5)            | 13 (61.9)    |                |
| <b>Total</b>      | 13              | 32                  | 31           | 37                   | 21           |                |

Abbreviations: ACM = acetaminophen, DILI = drug-induced liver injury, AKIN = acute kidney injury network

**Supplementary Table 2:** Comparison of recent and current data on acute kidney injury in the setting of acute liver failure. Values are given as absolute numbers (percentage) or medians (interquartile ranges). AKIN = Acute kidney injury network (criteria), ELT = emergency liver transplantation, n.a. = not available, RRT = renal replacement therapy,

| <b>First Author<br/>(date of publication)</b> | <b>Wilkinson<br/>(1974)</b> | <b>Leithead<br/>(2009)</b> | <b>O’Riordan<br/>(2011)</b>  | <b>Tuijos<br/>(2014)</b>     | <b>Hadem<br/>(2019)</b>          |
|-----------------------------------------------|-----------------------------|----------------------------|------------------------------|------------------------------|----------------------------------|
| <b>Patient number</b>                         | 48                          | 308                        | 302                          | 1604                         | 134                              |
| <b>Country</b>                                | England                     | Scotland                   | England                      | USA                          | Germany                          |
| <b>Patients with ALF</b>                      | 48                          | 308                        | 302                          | 1604                         | 134                              |
| <b>Patients with ELT included</b>             | no                          | yes                        | no                           | yes                          | yes                              |
| <b>Non-acetaminophen etiology (%)</b>         | 33 (69)                     | 101 (30)                   | 0 (0)                        | 867 (54)                     | 123 (92)                         |
| <b>Baseline creatinine (µmol/l)</b>           | n.a.                        | n.a.                       | n.a.                         | n.a.                         | 64 (53-79)                       |
| <b>AKI definition</b>                         | Creatinine > 1.8 mg/dl      | Creatinine 2-fold ULN      | AKIN (creatinine-based only) | AKIN (creatinine-based only) | AKIN (creatinine + urine output) |
| <b>AKI on admission (%)</b>                   | n.a.                        | 133 (43)                   | n.a.                         | n.a.                         | 54 (40)                          |
| <b>AKI during clinical course</b>             | 38 (79)                     | 208 (67)                   | 239 (79)                     | 1.118 (30)                   | 85 (63)                          |
| <b>Worst creatinine (µmol/l)</b>              | n.a.                        | 288 (135–392)              | n.a.                         | n.a.                         | 138 (68-245)                     |

|                                          |        |          |                         |                         |                        |
|------------------------------------------|--------|----------|-------------------------|-------------------------|------------------------|
| <b>Worst urine output (ml/24h)</b>       | n.a.   | n.a.     | n.a.                    | n.a.                    | 970 (120-2450)         |
| <b>Time to maximum AKIN stage (days)</b> | n.a.   | n.a.     | n.a.                    | n.a.                    | 1 (0-4)                |
| <b>AKIN stage 0</b>                      | 10     | n.a.     | 63 (21)                 | 486 (30)                | 49 (37)                |
| <b>AKIN stage 1/2</b>                    | n.a.   | n.a.     | 44 (14)                 | 558 (35)                | 23 (17)                |
| <b>AKIN stage 3</b>                      | 38     | n.a.     | 195 (65)                | 561 (35)                | 62 (46)                |
| <b>RRT</b>                               | n.a.   | 146 (47) | 182 (93)                | 491 (31)                | 52 (39)                |
| <b>Long-term RRT</b>                     | n.a.   | n.a.     | 0 (0)                   | 10 (4)                  | n.a.                   |
| <b>Long-term creatinine</b>              | n.a.   | n.a.     | n.a.                    | n.a.                    | 76 (63-101)            |
| <b>ELT</b>                               | n.a.   | 84 (28)  | 0 (0)                   | 388 (24)                | 63 (47)                |
| <b>ELT-free survival</b>                 | 6 (13) | 113 (37) | n.a.                    | 776 (48)                | 31 (23)                |
| <b>Survival in AKIN 0</b>                | 6 (60) | n.a.     | 0 (0)                   | 450 (93)<br>[at day 21] | 45 (92)<br>[at day 28] |
| <b>Survival in AKIN 3</b>                | 0 (0)  | n.a.     | 162 (62)<br>[at day 50] | 322 (57)<br>[at day 21] | 26 (42)<br>[at day 28] |

**Supplementary Figure 1: Serum Creatinine before, during, and after the acute phase of ALF.**

Scatter dot blot shows baseline creatinine, creatinine at ICU admission, worst creatinine during clinical course and follow-up creatinine (median of 226 [162-282] days after hospital admission). \*  $p < 0.05$ ,

\*\*\*  $p < 0.001$ , \*\*\*\*  $p < 0.0001$ .

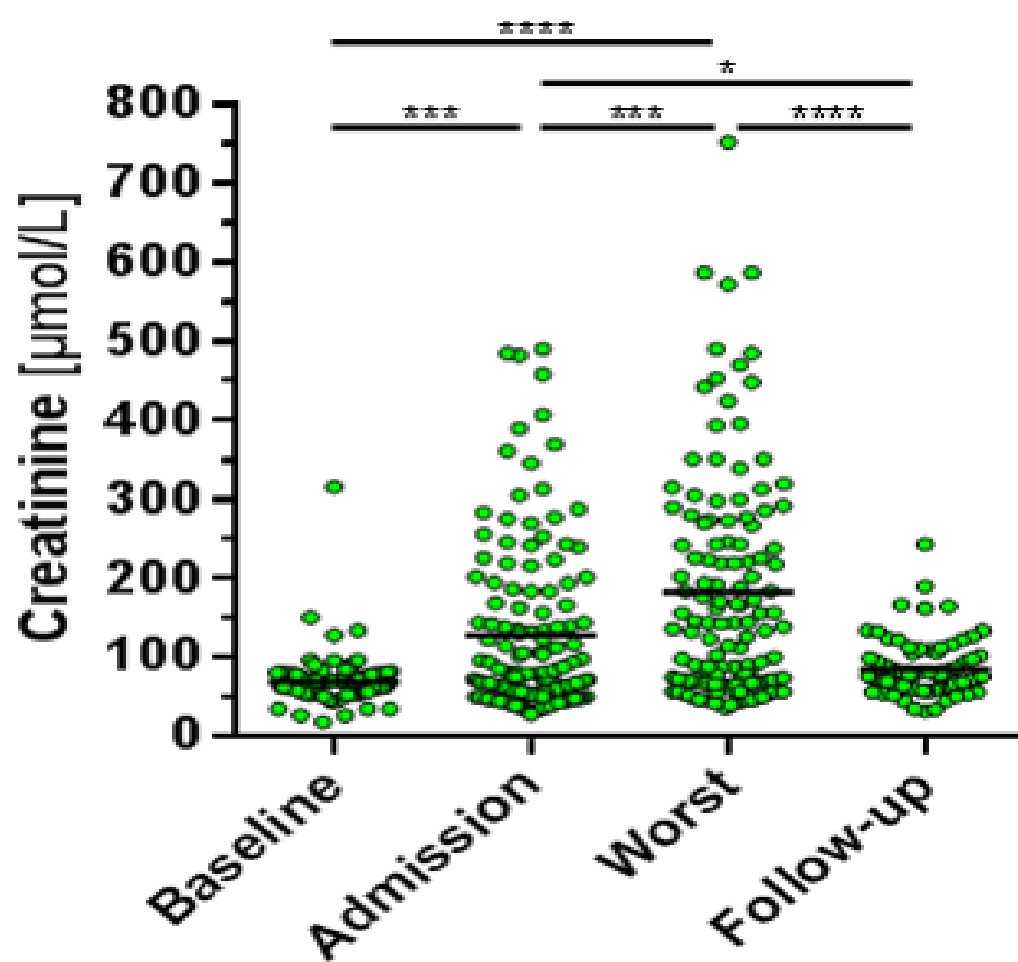

Supplement: Supplemental_Material4.pdf [file Supplemental_Material4.pdf]
